# Supplementary material for: p73 is required for appropriate BMP-induced mesenchymal-to-epithelial transition during somatic cell reprogramming
Source: PubMed Central journal article supplement (PMC5636977; doi:10.1038/cddis.2017.432), 2017-09-07

**a hSMAD6 (ENSG00000137834)**

```

-3000 tgggtttttaa tccggcatcg gctactaatt ataagcttgt gcaagttact tttggcaagc
      ctttgtgcct cagtgtcttt atctataaaa tggtgataat aggccggacg tggtggtctca
      cacctataat cccaacaactt tgggaggcta gggccggcag atctcttcag gcaggtcagg
      agttcggagc cagcctggtc aacatggtaa agccccgtct ctactaaaaa tacaaaaatt
tgctgggcat ggtggcgcat gcctgtagtt ccagctactt ggccgggctg aggcaggaga
      atcacttgaa cccgggaggt ggaggttgca gtgagccaag atcgcaccac tgcactccag
      gctggggata gagtgagact ccgtctcaaa aaataagcaa aaaatggtgg taacaggccg
      ggcgtggtgg ctcacgctta taatcccaac actttgggag gccgaggcag gcggatcact
      tcaggcaggt caggagttcg agaccagcct ggccaacatg gtgaaaccac gtctctacta
      aaaatacaaa aattagccgg gcatagtggg gcatgcctat agttccagct atttgggagg
      ctgaggcacg agaatcactt gagtgagagc ctgagatccc accactgcac tccagtctgg
      ggacagagca aggtctctgtc tcaaaaaaat aaatacatta aataaaaaat aaaaaataaa
      tggtggttaac aaccacagct atccccaaaa cgttgtattc tggggcctca acccctgaca
      ctttgattca gcaggtggac ctttgaaca cattedggaa atccctgcct aaagagtata
      gtctggcatc acagacctac acaccacttc cagccagagg atgagcaggc gtgtgtggtc
      atgcctctct ggttttagca tgttagcatt gtcaatgtca tcctcgtttt agtggcaagt
      tacatgagtg agctcctgtg cctcagtttt cctcatctgt aactggagat aataatagta
      actatgtaa gtccttatat attaataata atagtaccta tgtaaagtgt tgtgagcgtt
      aactaagtcc tggaaacattg ccttgcccat agtaacgact caatacgcac gaactattat
      tattgtaata cacagtcaaa gataatccac aaagagcata cacggggata aaagaaaata
      cactgagttt ctgtttgtat tttaagatgt attaatttcc ccatgggcca aaagtgactg
      aaaggggcca caagacaggc ttctgggggtg caggtcagggt tgcttttttg gtgctggtga
      catcatgtgt gtttgttcac gtgtgaaaat tcacctgtgt gtccgcttg gatttgtgca
      tttaacgtgc actatctcca gggaccttcg tggttctgtg aagcacgaag ggcaagcatc
      ctcatccgcg gtttcaaaca agaaactgag gctaggaccg ctactttaat ttggccaaag
      tagtagggga tgggtgtgag gaagtgtctc agtccgatct ttctttcggg gagcaacggc
      cactctcaga gagcgcagcg cgaacagtac ctggttccag gtaaagctca gcaaagggtt
      ctgaatcctc cttgcaaatg ccacccttc cccagcgcac acagactctg ggcacggccg
      ggggttcgca ccgccgcgca ctccccaggc tagctccacg cgtgggtcact ctccagggag
      acccgccccg cggcgccccg cggtcaccgc gggggaatgg cgcccagccc cgggccaatg
      agagtagcgg aatttctttc attcagcgcg gggccaggct cctgcccgga aaggggcccg
      gcgcgcgcgc gggggtgggg ccgcgcgcgc cggggggaga gggcggggcc ggcccctctg
      cctggccaat cggcgccgcg ccgggggggg gagggggggc caggcctttt tccccctcgc
      cgcgggacca atcccgactt tacaagcttg aacttttgcc accctcggac tagcgagcgc
      gcccgaggag gtaccccgcc gcgcggcctc caggggcagg agcggcctta acccttcccg
      cgccgggctg caggtgtctg ccgcgcgcgc cccgatcccg cccccacc cccccattt
      tcgcgtgtaa acctctctag ggaaagcgtg atccctcacc tacagcccctc tccgaggtgc
      ggagagtaaa cttgagaagg gagaggaagc acccggcctg gagggggccc ggccggccgg
      cccgcctctc accccaccct ctccatctcc ccaactccgg cgagcctgga gccaccgtac
      gcaaagcgtc ctgagctccc tgtttggccc ggcagagcga cccccgactt tgtgcaagga
      gcgtagagcc cctagtgcag tcaoggaaga tccgctaccc caacatatcc gccgccccct
      gctcctcaga ggctcaacc tggaaaggcac acatgcacac ccatttttat tagcctaccc
      taggatgggg gtttgaaca actttaaagt gcaaagtgtg tttgtaagt tgtgcacaag
      ccagggagag gcaaagcgc ccgtttgcgt ccgagtctca gtgggtccgc cgagccttgc
      gcgcctgctc tgggctcgtg taaccctgtg tgtgtgtgtg tgtgtgtccg cgcgcgcgtg
      tgtgctcgtc cgcacccgtg ctctggggcg aacgcgaggc agaaagcggg ccgcgggcgc
      tgtcaggccc tgggcccggg tgccgggggt gtgtggggcg ggggcccag ctcgcccccg
      cccgggagcc ggccccttgg agcctccggc cctgcaatgg gacgtgttct cctttaagag
-60 ttaagaaact tgaaaccttg tttgcgcaac aatcagcgc cgggagccgc caaagtgtct TSS

```

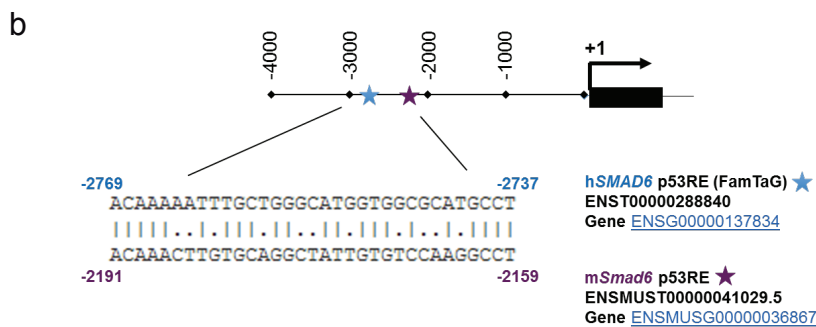

Supplement: cddis2017432x4.pdf [file cddis2017432x4.pdf]
