# Supplementary material for: p73 is required for appropriate BMP-induced mesenchymal-to-epithelial transition during somatic cell reprogramming
Source: PubMed Central journal article supplement (PMC5636977; doi:10.1038/cddis.2017.432), 2017-09-07

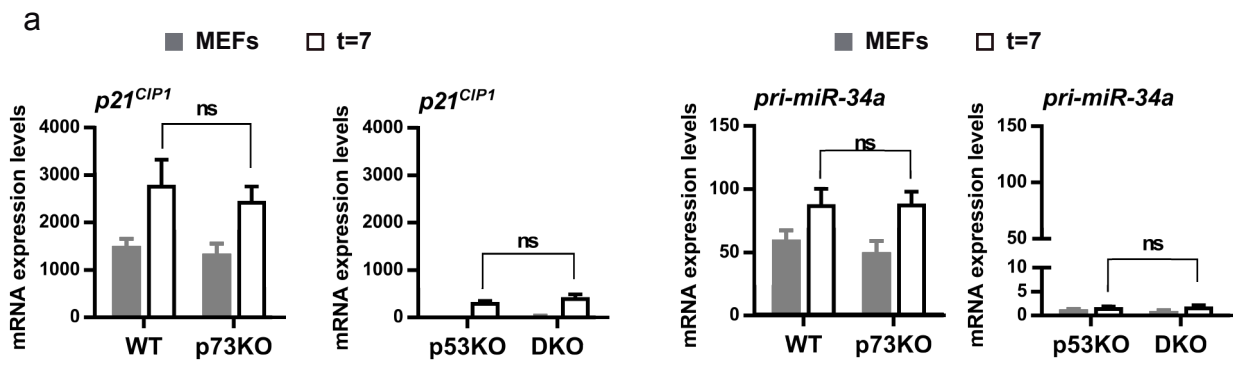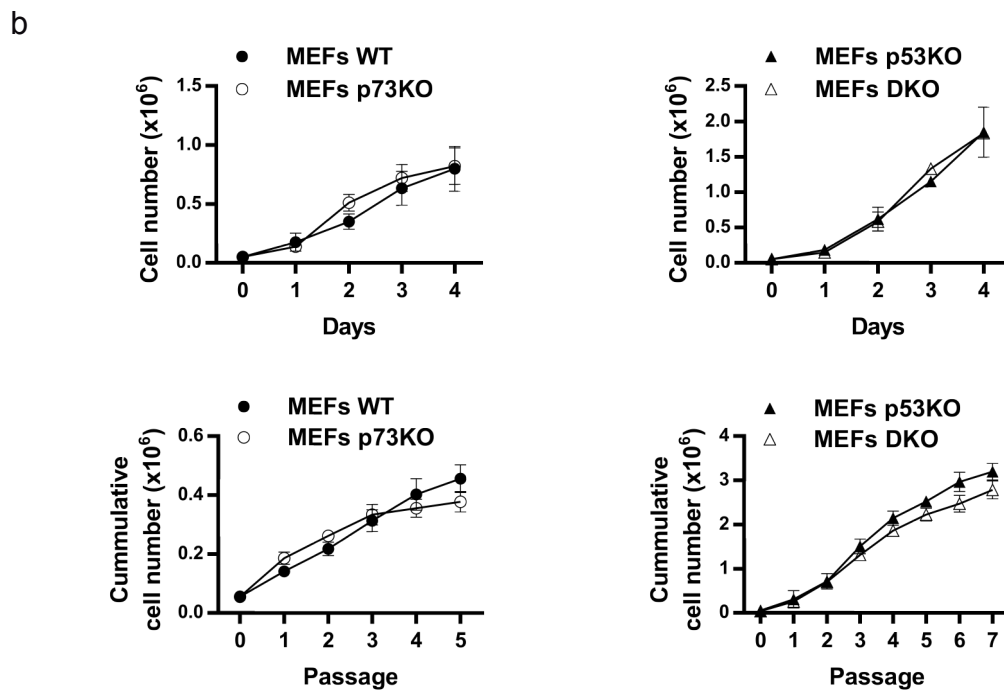

Supplement: cddis2017432x1.pdf [file cddis2017432x1.pdf]
