# Supplementary material for: p73 is required for appropriate BMP-induced mesenchymal-to-epithelial transition during somatic cell reprogramming
Source: PubMed Central journal article supplement (PMC5636977; doi:10.1038/cddis.2017.432), 2017-09-07
Supplement: cddis2017432x5.pdf [file cddis2017432x5.pdf]

Supplementary Table 1. Mouse qRT-PCR primer sequences.

| <b>mRNA</b>               | <b>Primers</b>                |
|---------------------------|-------------------------------|
| <b>18S</b>                | F5'AGTTCCAGCACATTTTGCGAG3'    |
|                           | R5'TCATCCTCCGTGAGTTCTCCA3'    |
| <b>Pecam1</b>             | F5'TACTGCAGGCATCGGCAA3'       |
|                           | R5'GCATTTTCGCACACCTGGAT3'     |
| <b>Cdh1</b>               | F5'CCCCCTTACGACTCTCTGTGGTGT3' |
|                           | R5'TCGGTTGCCCACTCGTTCAGATA3'  |
| <b>Epcam</b>              | F5'GCGGCTCAGAGAGACTGTG3'      |
|                           | R5'CCAAGCATTTAGACGCCAGTTT3'   |
| <b>Id1</b>                | F5'GGCTGCTACTCACGCCTCAA3'     |
|                           | R5'GATCGTCGGCTGGAACAC3'       |
| <b>Lin28</b>              | F5'GGCATCTGTAAGTGGTTCAACG3'   |
|                           | R5'CCCTCCTTGAGGCTTCGGA3'      |
| <b>Nanog</b>              | F5'CTCATCAATGCCTGCAGTTTTTCA3' |
|                           | R5'CTCCTCAGGGCCCTTGTCAGC3'    |
| <b>p21<sup>CIP1</sup></b> | F5'CCTGGTGATGTCCGACCTG3'      |
|                           | R5'CCATGAGCGCATCGCAATC3'      |
| <b>pri-miR34a</b>         | F5'CTGTGCCCTCTTGCAAAGG3'      |
|                           | R5'GGACATTCAGGTGAGGGTCTTG3'   |
| <b>Smad6</b>              | F5'GGCTGTCTCCTCCTGACCAGT3'    |
|                           | R5'CAATGTAGAATCGGACAGATC3'    |
| <b>Snail1</b>             | F5'CACACGCTGCCTTGTGTCT3'      |
|                           | R5'GGTCAGCAAAGCACGGTT3'       |
| <b>TAp73</b>              | F5'GCACCTACTTTGACCTCCCC3'     |
|                           | R5'GCACTGCTGAGCAAATTGAAC3'    |
| <b>ΔNp73</b>              | F5'ATGCTTTACGTCGGTGACCC3'     |
|                           | R5'GCACTGCTGAGCAAATTGAAC3'    |
